# Supplementary material for: Phenolic Compounds from Apples: From Natural Fruits to the Beneficial Effects in the Digestive System
Source: MDPI journal article supplement (doi:10.3390/molecules29030568), 2024-01-23
Supplement: s1 [file s1]

# Supplementary Materials

## Phenolic Compounds from Apples: from Natural Fruits to the Beneficial Effects in the Digestive System

Lidija Jakobek <sup>1,\*</sup>, and Petra Matić <sup>1</sup>

**Table S1.** The amounts of native phenolic compounds from apples released in different phases of the digestion (*in vitro* simulated digestion) and in the colon from insoluble matrix after *in vitro* digestion.

| Phenolic       | Apple                              | Before | Salivary | Gastric | Intestinal | Colon* | Reference |
|----------------|------------------------------------|--------|----------|---------|------------|--------|-----------|
| Flavonols      | Peel (mg/100 g fw)                 | 72-193 | 6-76     | 7-68    | 14-77      |        | 23        |
|                | Peel (mg/100 g fw)                 | 22     |          | 11      | 13         |        | 24        |
|                | Peel (rutin) (mg/100 g fw)         | 10-44  | 4-15     | 7-29    | 5-21       |        | 6         |
|                | Flesh (mg/100 g fw)                | 2      |          | 0.8     | 2          |        | 24        |
|                | Flesh (rutin) (mg/100 g fw)        | 1-11   | 0.4-4    | 0.7-7   | 0.5-5      |        | 6         |
|                | Whole apple (mg/100 g fw)          | 11-15  |          | 10-15   | 12-19      |        | 5         |
|                | Flesh (µg/g dw)*                   |        |          |         | 0.1-1.9    | 0.3-3  | 25        |
|                | Peel (µg/g dw) *                   |        |          |         | 52-93      | 47-78  | 25        |
|                | Whole apple (µg/g dw) *            |        |          |         | 8-59       | 2-20   | 25        |
| Phenolic acids | Peel (mg/100 g fw)                 | 36-58  | 3-23     | 8-23    | 0-6        |        | 23        |
|                | Peel (mg/100 g fw)                 | 14     |          | 4       | 3          |        | 24        |
|                | Flesh (mg/100 g fw)                | 30-41  | 5-12     | 12-21   | 1-4        |        | 23        |
|                | Flesh (mg/100 g fw)                | 3      |          | 1       | 1          |        | 24        |
|                | Whole apple (mg/100 g fw)          | 13-18  |          | 11-18   | 5-9        |        | 5         |
|                | Flesh (µg/g dw) *                  |        |          |         | 2.1-46     | 3-120  | 25        |
|                | Peel (µg/g dw) *                   |        |          |         | 1-14       | 5-62   | 25        |
|                | Whole apple (µg/g dw) *            |        |          |         | 83-120     | 46-113 | 25        |
| Dihydrochalcon | Peel (mg/100 g fw)                 | 1-8    | 0-3      | 0-2     | 0-4        |        | 23        |
|                | Peel (mg/100 g fw)                 | 4      |          | 1       |            |        | 24        |
|                | Peel (phloridzin) (mg/100 g fw)    | 5-68   | 1-18     | 2-27    | 2-31       |        | 6         |
|                | Flesh (mg/100 g fw)                | 0.3-1  | 0.1      | 0.3-0.5 | 0-0.3      |        | 23        |
|                | Flesh (mg/100 g fw)                | 1      |          | 0.6     |            |        | 24        |
|                | Flesh (phloridzin) (mg/100 g fw)   | 1-10   | 0.3-3    | 0.4-4   | 0.5-5      |        | 6         |
|                | Whole apple (mg/100 g fw)          | 2-3    |          | 2       | 3-5        |        | 5         |
|                | Flesh (µg/g dw) *                  |        |          |         | 0.1-19     | 0.3-11 | 25        |
|                | Peel (µg/g dw) *                   |        |          |         | 4-19       | 3-29   | 25        |
|                | Whole apple (µg/g dw) *            |        |          |         | 9-38       | 3-18   | 25        |
| Flavan-3-ols   | Peel (mg/100 g fw)                 | 40-156 | 2-64     | 7-85    | 0-4        |        | 23        |
|                | Peel (mg/100 g fw)                 | 20     |          | 6       |            |        | 24        |
|                | Peel (procyanidins) (mg/100 g fw)  | 6-44   | 2-15     | 2-17    | 3-25       |        | 6         |
|                | Flesh (mg/100 g fw)                | 11-21  | 0.5-1.2  | 3-4     |            |        | 23        |
|                | Flesh (mg/100 g fw)                | 3      |          | 4       |            |        | 24        |
|                | Flesh (procyanidins) (mg/100 g fw) | 16-79  | 6-28     | 6-32    | 9-44       |        | 6         |
|                | Whole apple (mg/100 g fw)          | 10-15  |          | 6-12    |            |        | 5         |
|                | Flesh (µg/g dw) *                  |        |          |         | 0-0.003    | 0.1-6  | 25        |
|                | Peel (µg/g dw) *                   |        |          |         | 0          | 2-16   | 25        |
|                | Whole apple (µg/g dw) *            |        |          |         | 0.04-0.6   | 1-10   | 25        |
| Anthocyanins   | Peel (mg/100 g fw)                 | 0.2-20 | 0-4      | 0-6     |            |        | 23        |
|                | Peel (mg/100 g fw)                 | 2      |          | 4       |            |        | 24        |

|                                 |                           |         |        |        |         |    |
|---------------------------------|---------------------------|---------|--------|--------|---------|----|
| <b>Total phenolic compounds</b> | Peel (mg/100 g fw)        | 153-424 | 11-167 | 22-182 | 15-91   | 23 |
|                                 | Peel (mg/100 g fw)        | 62      |        | 22     | 16      | 24 |
|                                 | Peel (µg/g dw)            |         |        |        | 75-100  | 25 |
|                                 | Flesh (mg/100 g fw)       | 48-63   | 6-13   | 17-25  | 1-4     | 23 |
|                                 | Flesh (mg/100 g fw)       | 9       |        | 6      | 3       | 24 |
|                                 | Flesh (µg/g dw)           |         |        |        | 2.3-66  | 25 |
|                                 | Whole apple (mg/100 g fw) | 36-52   |        | 29-47  | 18-27   | 5  |
|                                 | Whole apple (µg/g dw)     |         |        |        | 104-196 | 25 |
|                                 | Flesh (µg/g dw) *         |         |        |        | 4-138   | 25 |
|                                 | Peel (µg/g dw) *          |         |        |        | 68-192  | 25 |
|                                 | Whole apple (µg/g dw) *   |         |        |        | 53-166  | 25 |

\*The release of phenolic compounds in the colon from indigestible insoluble material remained after the in vitro gastrointestinal digestion. Experiments were conducted with the help of pronase to simulate the action of bacterial protease, and with the help of Viscozyme L (cellulolytic enzyme mixture) to completely disrupt the apple matrix [27]
